# Supplementary material
Source: PubMed Central journal article supplement (PMC5967776)
Supplement: ASN.2017101091SupplementaryData2.pdf [file ASN.2017101091SupplementaryData2.pdf]

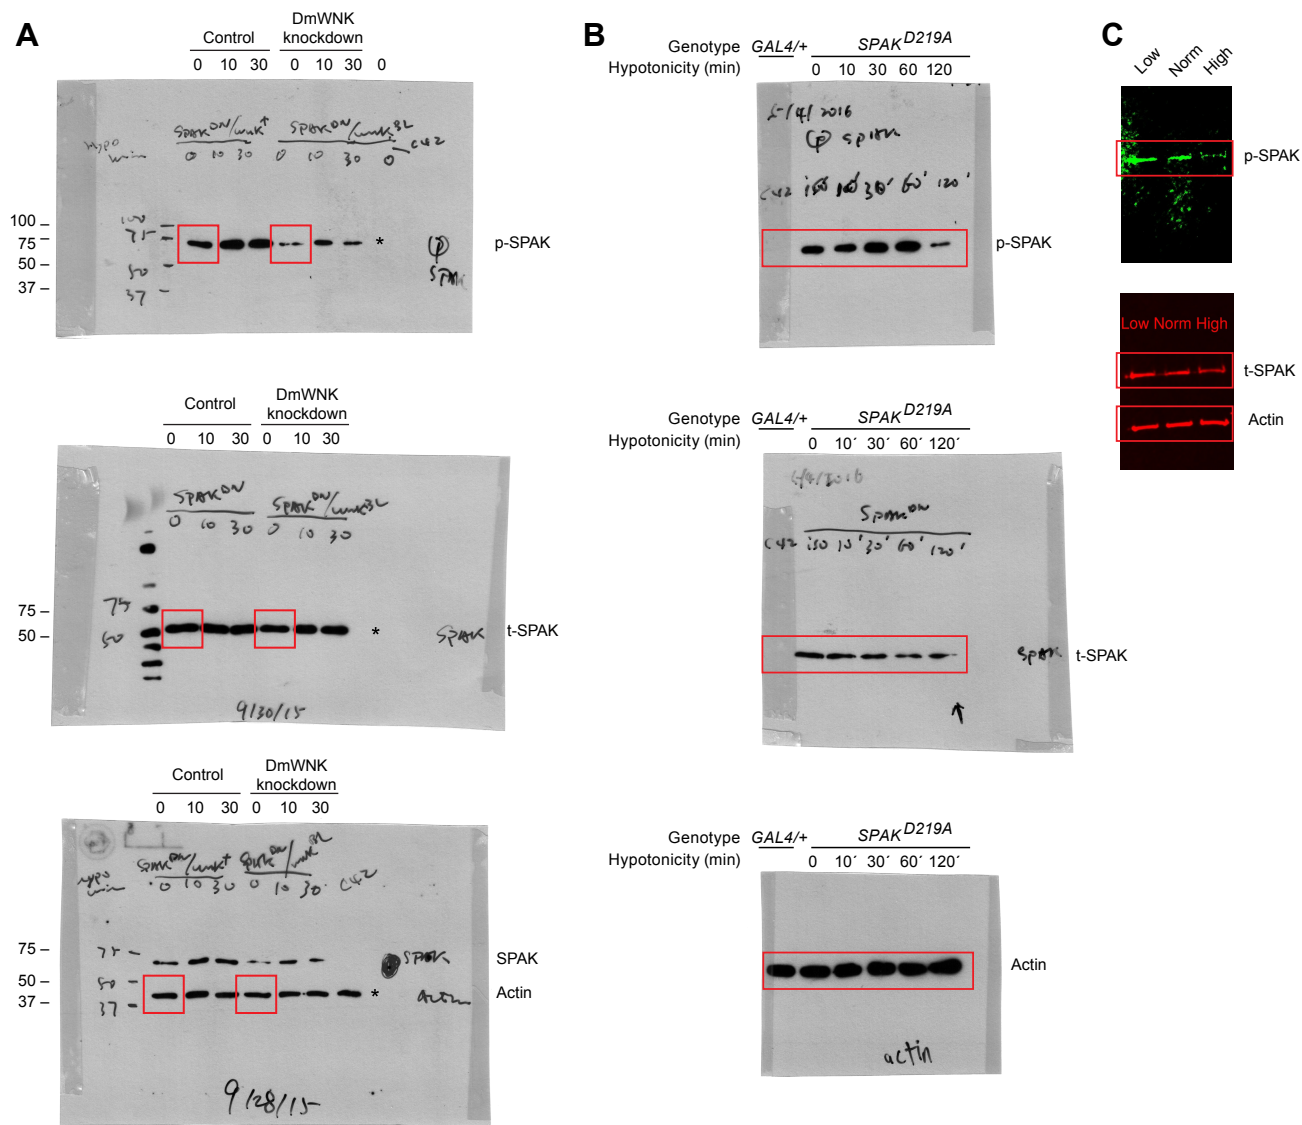

Supplement Figure 6  
Q. Sun, et al.

**Supplemental Figure 6. Whole gels from Figure 3.** Shown are the whole gels from which the gels in Figures 3A, B and C were taken. \*, band used in Figure 3A; only the 0 minute timepoints were used, as highlighted (see also Supp Figure 4). In C, gels were transformed to greyscale for presentation in Figure 3A.
